# Supplementary material for: Fine-scale substrate heterogeneity does not affect arthropod communities on green roofs
Source: PeerJ. 2019 Mar 19;7:e6445. doi: 10.7717/peerj.6445 (PMC6430103; doi:10.7717/peerj.6445)
Supplement: Data S1 [file peerj-07-6445-s001.xlsx]

## Sheet: fig s1
School	rain 2015	rain 2016	max temp jan 2015	max temp jan 2016	arthropod s 15	arthropod s 16
dinur	577.4	337.5	19.45	18.77	212	165
ben gurion	585.6	345.5	17.34	16.94	188	175
matos	635.3	347.5	16.37	16.19	217	169

## Sheet: fig 2
2015
ID	Anobiidae 10 segments in antenn 5 segments on all legs, 1.7 mm 2C1 30,11,14	Anobiidae2 10 segmens on antenna, 2.8 mm 2E5 30,12,14	Anobiidae3 small clab antenna, 1.2 mm 3D5 3,3,15	Tenebrionidae 8.7.14 1B2	brown beetle 2.25 4F4 26,3,15	brown beetle, 10 segment in antena, 5 segment in abdomen, 8,7,14 4B4 כנפי חפייה שעירות, 3 פרקים אחרונים באנטנה בצורת אלה	brown bettel 3 mm, 10 segmens in anttena, 1A2 5.5.15	Brachytemnus porcatus	brown egg shape body 2.5-3mm light brown legs, 10 segmens in the antena 4F4 29.5.14	black metal bettle with spots 10 segmens in antenna 2 mm 4A2 30,11,14	black beetle 4 mm 10 segments in antena. 4B1 30,11,14	Bostryichidae dark brown 1.4 mm 8,7,14 2E1	Bruchidae 1C4 3,6,15	Bruchidae2 3C2 3,5,15	Coccinella septempunctata, 8 mm 3B1, 26,3,15	Carabidae 15mm 10 segmens on antena, 5,5 segmens on legs, 4F3 30,11,14	Carabidae2 9mm, 10 segments in antenna 3C1, 26,3,15	Carabidae3 10 segmens on antena, 3.5 mm 3A3 30,11,14	Carabidae4 10 segment in antenna, 4E4 26,3,15	Carabidae5 1C3 16,7,15	Carabidae6 4E2 3,6,15	Curculionidae1 3 mm black with boomerang antenna, 2C1 29,1,15	Curculionidae2 9 segmens in antenna, 2.5mm 3B4 3,3,15	Curculionidae3 2 mm, 9 segmens in antenna, 2A1 26,3,15	Scarabaeidae brown with diging legs, 3.2 mm 3E3 30,11,14	Scarabaeidae2 (flaten Clabs!) 2C5 16,7,15	stafilidea 1.8 mm 4C2 3,3,15	Staphilidea lite brown, 10 segments in antenna, 1B1 26,3,15	Staphlinidea 3.5 mm 1A1 3,3,15	Staphilidea 6 mm 10 segmens in antenna. 1A3 30,11,14	Staphlinidae 4 mm 9 segmens in antena,capitata antana. 3E2 30,11,14	Staphilidea 9 mm 1E4 29,1,15	hairy black beetle, 2 mm, 3B1 20,8,14	tiny red beetle	small bettle with feather wings 1mm 1E2 30,11,14	small rounded Beetle 2 mm 4A3 3,3,15	Oryzaephilus surinamensis	Permestidea 2F3 5,5,15	Bostrychidae dark brown 1.4 mm 8,7,14 2E1	Codophila varia	coreidae 1B4 3,6,15 (הרבה ורידים)	Pyrrhocoris 3E5 16,7,15	Reduviida nymph, 4 segment in antena. 8,7,14 1B4	Ruduiividea2 nymph 1B2 16,7,15	Reduviida2 -very long legs and antena, 2 pairs of wings 4.5 mm 20.8.14 4C2	Reduviidae3 nymfh 3.5 mm 3A2 26,3,15	Reduviidae4 large femar, 1F1 26,3,15	Reduviidae5, 5.5 mm, nymph 2A5 5,5,15	Reduvidae6 4D2 5,5,15
1A.2	0	0	0	0	0	0	1	0	0	0	0	0	0	0	0	0	0	0	0	0	0	0	0	0	0	0	0	0	11	2	0	0	0	6	0	0	0	0	0	0	0	0	0	0	0	0	0	0	0
2A.2	0	0	0	0	0	0	0	0	0	0	0	0	0	0	0	0	0	0	0	0	0	0	0	1	0	0	0	0	9	0	0	0	1	2	0	1	0	0	0	0	0	0	0	0	0	0	0	1	0
3A.2	0	0	0	0	0	0	0	0	0	0	0	0	0	0	0	0	0	1	0	0	0	0	0	0	0	0	0	0	10	0	0	0	1	4	0	1	0	0	0	0	0	0	0	0	0	1	0	0	1
4A.2	0	0	0	0	0	0	0	0	0	2	0	0	0	0	0	0	0	0	0	0	0	0	0	0	0	0	0	0	24	0	1	0	1	1	0	3	0	0	0	0	0	0	0	0	0	0	0	0	2
1B.2	0	0	0	1	0	0	0	0	0	0	0	0	0	0	0	0	0	0	0	0	0	0	0	0	0	0	0	1	13	0	0	0	0	5	0	0	0	1	0	0	0	0	1	0	0	0	0	0	0
2B.2	0	0	0	0	0	0	0	0	0	1	0	0	0	0	0	0	0	0	0	0	0	0	0	0	0	0	0	0	13	1	0	0	1	1	0	0	0	0	0	0	0	0	0	0	0	0	0	0	0
3B.2	0	0	0	0	0	0	0	0	0	0	0	0	0	0	1	0	0	0	0	0	0	0	1	0	0	0	0	0	5	1	0	0	1	1	0	0	0	1	0	0	0	0	0	0	0	0	0	0	0
4B.2	0	0	0	0	0	1	0	0	0	0	1	0	0	0	0	0	0	0	0	0	0	0	0	0	0	0	0	1	1	1	0	0	2	2	0	0	0	0	0	0	0	0	0	0	0	0	0	0	0
1C.2	0	0	0	0	0	0	0	0	0	0	1	1	0	0	0	0	0	0	0	0	0	0	1	1	0	0	1	0	5	0	0	0	0	7	0	0	0	0	0	0	0	0	0	0	0	0	0	0	0
2C.2	1	0	0	0	0	0	0	0	0	0	0	0	0	0	0	0	0	0	0	0	0	0	0	0	0	0	0	0	4	0	0	0	4	7	0	0	0	0	1	0	0	0	0	0	0	0	0	0	1
3C.2	0	0	0	0	0	0	0	0	0	0	0	0	1	0	0	0	1	0	0	0	0	0	0	0	0	0	0	0	5	0	0	0	2	9	0	0	0	0	0	0	0	0	0	0	0	0	0	0	0
4C.2	0	0	0	0	0	0	0	0	0	1	0	0	0	0	0	0	0	0	0	0	0	0	0	0	0	0	1	0	3	1	0	0	1	5	0	0	0	0	0	0	0	0	0	0	2	0	0	0	8
1D.2	1	0	0	0	0	0	0	0	0	0	0	0	0	0	0	0	0	0	0	0	0	0	0	0	0	0	0	0	10	1	0	0	1	6	0	0	0	0	0	0	0	0	0	0	0	0	0	0	5
2D.2	0	0	0	0	0	0	0	0	0	1	0	0	1	0	0	0	0	0	0	0	0	0	0	0	0	0	0	0	25	0	0	0	2	10	0	1	0	0	0	0	0	0	0	0	0	0	0	0	4
3D.2	0	0	1	0	0	0	0	0	0	0	0	0	0	0	0	0	0	0	0	0	0	0	0	0	0	0	0	0	55	1	0	0	2	6	0	1	0	0	0	0	0	0	0	0	0	1	0	0	4
4D.2	0	0	0	0	0	1	0	0	0	1	0	0	0	0	1	0	0	0	0	0	0	0	0	0	0	0	0	0	4	0	0	0	1	10	1	0	0	0	0	0	0	0	0	0	0	0	0	0	1
1E.2	0	1	0	0	0	0	0	0	0	0	0	0	0	0	0	0	0	0	0	0	0	0	0	0	0	0	0	0	3	0	0	1	0	0	1	0	0	0	0	0	0	0	0	0	0	0	0	0	0
2E.2	0	1	0	0	0	0	0	0	0	0	0	1	0	0	0	1	0	0	0	0	1	0	0	0	0	0	0	0	12	2	0	0	1	1	0	1	0	0	1	0	0	0	0	0	0	0	0	0	0
3E.2	0	0	0	0	0	0	0	0	0	0	0	0	1	0	0	0	0	0	0	0	0	0	0	0	1	0	0	0	35	4	1	0	1	4	1	7	0	0	0	0	0	0	0	0	0	0	0	0	3
4E.2	0	0	0	0	0	0	0	0	0	0	0	0	0	0	0	0	0	0	3	1	0	1	0	0	0	0	0	0	45	1	0	0	2	1	1	2	0	0	0	0	0	0	0	1	0	0	0	0	3
1F.2	0	0	0	0	0	0	0	0	0	0	1	0	1	0	0	0	0	0	0	0	0	0	0	0	0	0	0	0	18	0	0	0	1	2	0	1	0	0	0	0	0	0	0	0	0	0	1	0	3
2F.2	0	0	1	0	0	0	0	0	0	0	0	0	0	0	0	0	0	0	0	0	0	0	0	0	0	0	0	0	7	0	0	0	1	0	0	0	0	4	1	0	0	0	0	0	0	0	0	0	0
3F.2	1	0	0	0	0	0	0	0	0	1	0	0	0	0	0	0	0	0	0	0	0	0	0	0	1	0	0	0	5	2	0	0	0	1	0	0	0	0	1	0	0	0	0	0	0	0	0	0	1
4F.2	0	0	0	0	1	0	0	0	0	0	0	0	0	0	0	1	0	1	1	0	0	0	0	0	0	0	0	0	25	1	0	0	0	4	0	0	0	0	2	0	0	0	0	0	0	0	1	0	0
2016
1A.3	0	0	0	0	0	0	1	0	0	0	0	0	0	0	0	0	0	0	0	0	0	0	0	0	0	0	1	0	2	1	0	0	0	2	0	0	0	0	0	0	1	0	0	0	0	0	0	0	0
2A.3	0	0	0	0	0	0	2	0	0	0	0	1	0	0	0	0	0	0	0	0	0	1	0	0	0	0	1	0	8	0	0	0	0	1	0	1	0	0	0	0	0	0	0	0	0	0	1	0	0
3A.3	0	0	0	0	4	1	2	0	0	0	0	0	0	1	0	0	0	0	0	0	0	0	0	0	0	0	9	0	9	0	0	1	0	0	0	0	0	0	0	0	0	0	0	0	0	0	0	0	0
4A.3	0	0	0	0	5	1	0	0	0	0	0	1	0	0	0	0	0	0	0	0	0	0	0	0	1	0	1	1	23	18	0	0	0	0	0	1	0	0	0	0	0	0	0	0	0	0	0	0	0
1B.3	0	0	0	0	0	0	3	0	0	0	0	0	0	0	0	0	0	0	0	0	0	0	0	0	0	0	6	0	8	0	0	0	0	0	0	0	0	0	0	0	0	0	0	1	0	0	1	0	0
2B.3	1	0	0	0	0	0	0	0	0	0	0	1	0	0	0	0	0	0	0	0	0	0	0	1	0	0	2	0	9	2	0	1	0	0	0	0	0	0	0	0	0	1	0	0	0	0	1	0	0
3B.3	0	0	0	0	1	0	0	0	0	0	0	0	0	0	0	0	0	0	0	1	0	0	0	1	0	0	1	0	3	0	0	0	0	0	0	0	0	0	0	0	0	1	1	0	0	0	0	1	0
4B.3	0	0	0	0	0	0	1	0	0	0	0	0	0	0	0	0	0	0	1	0	0	1	0	1	0	0	5	0	6	5	0	0	0	0	0	0	0	0	0	0	0	0	0	0	0	0	3	0	0
1C.3	0	0	0	0	1	0	1	0	0	0	0	0	1	2	0	0	0	0	0	3	0	0	0	0	0	0	4	0	3	9	0	0	0	0	0	0	0	0	0	0	0	0	0	0	0	0	0	0	0
2C.3	2	0	0	0	0	0	0	0	0	0	0	0	0	0	0	0	0	0	0	0	0	0	0	0	0	1	2	2	6	2	0	1	0	1	0	0	0	0	0	0	1	0	0	0	0	0	0	0	0
3C.3	0	0	0	0	0	0	0	0	0	0	0	0	0	0	1	0	0	0	0	0	0	0	0	0	0	0	0	0	0	0	0	0	0	0	0	0	0	0	0	1	2	0	0	0	0	0	0	0	0
4C.3	0	0	1	0	0	0	0	0	0	0	0	1	0	0	0	0	0	0	0	0	0	0	0	0	0	0	1	0	9	4	0	0	0	0	1	0	0	0	0	0	0	1	0	0	0	0	0	0	0
1D.3	1	0	0	0	0	0	2	0	0	0	0	1	0	0	0	0	0	0	0	0	0	0	0	0	1	0	2	0	14	0	2	1	0	0	0	0	0	0	0	0	0	0	0	0	0	0	1	0	0
2D.3	0	1	0	0	1	1	4	0	0	0	0	0	0	1	0	0	0	3	0	1	0	1	0	0	0	0	1	1	36	2	0	0	0	0	0	0	0	0	0	0	0	0	0	0	0	0	2	0	0
3D.3	0	0	0	0	0	0	0	0	0	0	0	0	0	0	0	0	0	0	0	0	0	0	0	0	1	0	1	8	19	2	0	1	0	1	0	0	0	0	0	0	0	0	0	0	0	1	1	0	0
4D.3	0	0	0	0	0	1	0	0	0	0	0	1	0	0	0	0	0	0	0	0	0	0	0	0	0	0	0	0	2	1	1	0	0	0	0	0	0	0	0	0	0	0	0	0	0	0	2	0	0
1E.3	0	0	0	0	0	2	1	0	0	0	0	0	0	0	0	0	0	0	0	0	0	0	0	0	0	0	1	0	3	1	0	0	0	0	0	0	0	0	0	1	1	0	0	0	0	0	0	0	0
2E.3	0	0	0	0	1	0	0	0	0	0	0	0	0	0	0	0	0	1	0	0	0	0	0	0	0	0	9	3	14	2	1	0	0	0	0	0	0	0	0	0	0	0	0	0	0	0	0	0	0
3E.3	0	0	0	0	5	1	0	0	2	0	0	0	0	0	0	0	0	0	0	0	0	0	0	0	1	1	8	0	12	8	2	3	0	0	0	0	0	0	0	0	0	1	0	1	0	0	2	0	0
4E.3	0	0	0	0	2	0	2	0	0	0	0	0	0	0	0	0	0	0	0	0	0	0	0	0	1	0	0	0	6	10	1	1	0	0	0	5	0	0	0	0	0	0	0	0	0	0	0	0	0
1F.3	0	0	0	0	3	0	0	0	0	0	1	0	0	2	0	0	2	0	0	0	0	3	0	0	0	0	2	3	5	1	0	0	0	1	0	0	0	1	0	0	1	0	0	0	0	0	3	0	0
2F.3	0	0	0	1	1	0	1	1	0	0	0	0	0	1	0	0	0	0	0	0	0	0	0	0	2	0	1	0	5	3	0	0	0	1	0	2	0	0	0	0	1	0	0	0	0	0	1	0	0
3F.3	0	0	0	0	0	0	0	0	0	0	0	0	1	0	0	0	0	0	0	0	0	0	0	0	0	0	4	5	10	4	0	0	0	0	0	0	1	0	0	0	0	0	0	0	0	0	1	0	0
4F.3	0	0	0	0	6	3	3	0	0	0	0	0	0	0	0	0	0	0	0	0	0	0	1	0	0	0	5	1	19	2	0	0	0	0	0	3	0	0	0	0	0	0	0	1	0	0	1	0	0
NMDS values
Name	treatment	roof	year	Axis 1	Axis 2
1A.2	1	Dinur	2	0.0076272	-0.021188
2A.2	2	Dinur	2	0.036517	-0.042973
3A.2	3	Dinur	2	0.042766	-0.1709
4A.2	4	Dinur	2	0.043686	-0.12849
1B.2	1	Dinur	2	0.032228	-0.010469
2B.2	2	Dinur	2	0.032586	-0.04487
3B.2	3	Dinur	2	0.029573	0.014544
4B.2	4	Dinur	2	0.030648	-0.027268
1C.2	1	Ben Gurion	2	-0.08265	-0.081088
2C.2	2	Ben Gurion	2	-0.026556	-0.087563
3C.2	3	Ben Gurion	2	-0.078975	-0.084852
4C.2	4	Ben Gurion	2	-0.086379	-0.092223
1D.2	1	Ben Gurion	2	0.0025433	-0.064545
2D.2	2	Ben Gurion	2	0.02894	-0.090833
3D.2	3	Ben Gurion	2	-0.05137	-0.085545
4D.2	4	Ben Gurion	2	0.063481	-0.12358
1E.2	1	MATOS	2	0.15225	-0.051214
2E.2	2	MATOS	2	0.18726	-0.08508
3E.2	3	MATOS	2	0.13732	-0.0030638
4E.2	4	MATOS	2	0.13212	-0.018546
1F.2	1	MATOS	2	0.12621	-0.062341
2F.2	2	MATOS	2	0.19272	-0.042583
3F.2	3	MATOS	2	0.17957	-0.029524
4F.2	4	MATOS	2	0.17275	-0.069215
1A.3	1	Dinur	3	-0.073456	0.11361
2A.3	2	Dinur	3	-0.008939	0.14927
3A.3	3	Dinur	3	-0.081862	0.077527
4A.3	4	Dinur	3	-0.050676	0.068668
1B.3	1	Dinur	3	-0.011236	0.076812
2B.3	2	Dinur	3	-0.076851	0.1216
3B.3	3	Dinur	3	0.011261	0.099654
4B.3	4	Dinur	3	-0.06638	0.16263
1C.3	1	Ben Gurion	3	-0.21003	-0.031317
2C.3	2	Ben Gurion	3	-0.24904	-0.044898
3C.3	3	Ben Gurion	3	-0.19299	-0.042859
4C.3	4	Ben Gurion	3	-0.14419	-0.0081967
1D.3	1	Ben Gurion	3	-0.16589	-0.012819
2D.3	2	Ben Gurion	3	-0.14287	0.0051674
3D.3	3	Ben Gurion	3	-0.20886	-0.018613
4D.3	4	Ben Gurion	3	-0.2079	-0.025306
1E.3	1	MATOS	3	0.036425	0.070181
2E.3	2	MATOS	3	0.084271	0.11235
3E.3	3	MATOS	3	0.071662	0.12148
4E.3	4	MATOS	3	0.079	0.11196
1F.3	1	MATOS	3	0.096987	0.12753
2F.3	2	MATOS	3	0.07802	0.084024
3F.3	3	MATOS	3	0.045707	0.076972
4F.3	4	MATOS	3	0.082989	0.10796
[truncated: 320 more columns]

## Sheet: fig 3
ID	block	treatment	roof	S.chao1 1	S.chao1 2	S.chao1 3	herbivore s1	herbivore s2	herbivore s3	parasit(oid) s1	parasitoid s2	predator s1	predator s2	predator s3
1A	A	1	dinur	55.2	192.9	57.5	6	13	8	3	7	3	6	9
2A	A	2	dinur	49	147.4	96.11	4	10	10	3	4	1	10	9
3A	A	3	dinur	64.25	114.1	120	6	12	15	5	6	4	8	10
4A	A	4	dinur	82.5	98.38	149.4	5	11	17	3	5	1	11	8
1B	B	1	dinur	122	146.4	98.5	4	11	15	2	8	3	10	7
2B	B	2	dinur	47.75	177.5	97.36	3	10	15	4	5	1	9	13
3B	B	3	dinur	37.33	204.7	107	3	9	8	0	4	3	7	9
4B	B	4	dinur	69.75	113.3	121	4	8	13	4	5	0	6	11
1C	C	1	ben_gurion	29	80.6	180.3	3	14	19	2	2	3	4	10
2C	C	2	ben_gurion	83	112	103.6	5	10	16	1	5	2	5	10
3C	C	3	ben_gurion	20.6	126.5	72.46	4	12	14	1	3	0	5	5
4C	C	4	ben_gurion	53.33	94.5	89	6	14	14	2	5	1	10	9
1D	D	1	ben_gurion	17.75	84.63	103.6	4	12	14	2	6	2	10	10
2D	D	2	ben_gurion	20.25	113.8	122	4	11	18	2	6	0	6	17
3D	D	3	ben_gurion	74.5	120.1	119.1	4	10	13	4	5	2	11	13
4D	D	4	ben_gurion	44.5	139	65.75	3	11	14	2	7	2	7	8
1E	E	1	reali	115.6	227.7	74.27	7	12	16	8	3	2	6	7
2E	E	2	reali	62.1	136.8	102.5	6	12	14	8	6	3	9	11
3E	E	3	reali	82.5	116.8	104.7	6	15	14	2	2	2	6	14
4E	E	4	reali	82.5	175.4	82.77	4	15	14	3	9	3	11	10
1F	F	1	reali	57	124.1	109.9	7	17	20	1	3	4	8	12
2F	F	2	reali	55.33	111.6	111.2	4	14	16	4	5	1	6	11
3F	F	3	reali	46	121.8	128.1	10	11	17	5	5	1	7	11
4F	F	4	reali	74.67	116.6	119.5	7	12	14	5	6	5	12	13

## Sheet: fig4
ID	block	treatment	roof	arthropod abundance1	arthropod abundance2	arthropod abundance3	herbivore n1	herbivore n2	herbivore n3	parasit(oid) n1	parasitoid n2	parasitoid n3	predator n1	predator n2	predator n3
1A	A	1	dinur	127	939	1199	90	111	67	3	10	0	5	19	13
2A	A	2	dinur	126	874	1068	65	96	165	4	10	1	1	23	24
3A	A	3	dinur	188	1150	2042	158	122	78	8	8	4	4	19	37
4A	A	4	dinur	177	871	1541	102	178	273	8	19	3	1	41	56
1B	B	1	dinur	123	1262	1457	64	122	118	2	12	3	3	31	27
2B	B	2	dinur	141	985	1535	85	115	115	7	5	1	2	27	31
3B	B	3	dinur	179	1416	1087	64	85	104	0	9	0	3	13	11
4B	B	4	dinur	121	1076	2378	59	81	132	4	6	2	0	20	35
1C	C	1	ben_gurion	211	1116	3266	120	91	79	3	3	4	3	9	35
2C	C	2	ben_gurion	270	833	4265	232	167	57	1	6	2	2	8	24
3C	C	3	ben_gurion	209	1006	2718	199	73	59	2	6	0	0	9	8
4C	C	4	ben_gurion	283	1110	2054	237	184	128	4	12	0	1	24	24
1D	D	1	ben_gurion	297	742	2810	231	137	135	6	13	3	3	27	37
2D	D	2	ben_gurion	196	595	2710	139	103	259	3	14	4	0	33	58
3D	D	3	ben_gurion	276	1102	3947	173	140	118	5	7	4	2	72	42
4D	D	4	ben_gurion	227	721	3621	169	264	64	2	11	1	2	11	12
1E	E	1	reali	257	1088	1173	46	106	92	9	4	1	4	8	10
2E	E	2	reali	299	1486	2086	63	287	162	11	12	0	3	22	57
3E	E	3	reali	224	1027	1821	81	120	208	4	2	3	2	47	67
4E	E	4	reali	391	1238	1506	68	145	188	4	17	3	3	71	27
1F	F	1	reali	278	1193	1372	77	176	253	1	6	3	4	30	35
2F	F	2	reali	437	1478	952	116	318	114	4	5	1	2	15	22
3F	F	3	reali	443	1329	1174	117	192	206	6	12	3	1	12	33
4F	F	4	reali	478	1282	1573	133	228	226	11	14	4	6	47	56

## Sheet: fig5
ID	block	treatment	roof	collembola abundance1	collembola abundance2	collembola abundance3	collembola s1	collembola s2	collembola s3	soil ants n1	soil ant n2	soil ant n3	mite n2	mite n3
1A	A	1	dinur	10	420	905	3	14	13	0	54	43	96	88
2A	A	2	dinur	8	414	546	5	17	12	0	38	11	88	81
3A	A	3	dinur	5	745	1488	2	12	12	0	30	36	52	172
4A	A	4	dinur	10	412	877	4	13	15	0	35	6	35	126
1B	B	1	dinur	6	269	777	5	14	10	2	315	221	256	127
2B	B	2	dinur	3	310	1169	3	14	14	0	43	88	180	62
3B	B	3	dinur	15	795	449	3	12	13	0	215	303	68	83
4B	B	4	dinur	1	414	1833	1	12	11	1	177	163	166	107
1C	C	1	ben_gurion	0	644	2818	0	4	12	0	17	1	57	276
2C	C	2	ben_gurion	1	358	3902	1	7	11	0	3	0	200	218
3C	C	3	ben_gurion	0	664	2190	0	7	14	0	10	2	82	415
4C	C	4	ben_gurion	3	737	1595	2	9	8	0	23	0	44	253
1D	D	1	ben_gurion	0	244	2180	0	7	11	0	11	105	165	256
2D	D	2	ben_gurion	0	203	1707	0	5	11	0	15	129	121	500
3D	D	3	ben_gurion	0	594	3250	0	6	14	0	18	151	76	307
4D	D	4	ben_gurion	0	198	3019	0	7	11	1	1	131	82	353
1E	E	1	reali	0	20	251	0	4	9	75	93	357	460	79
2E	E	2	reali	2	12	240	2	3	11	158	145	658	219	69
3E	E	3	reali	1	20	229	1	3	9	76	109	518	77	260
4E	E	4	reali	0	14	148	0	2	10	255	69	357	285	157
1F	F	1	reali	2	78	125	2	3	8	67	223	639	205	25
2F	F	2	reali	1	5	93	1	3	10	53	397	355	362	87
3F	F	3	reali	1	183	187	1	5	9	42	118	283	236	128
4F	F	4	reali	0	45	179	0	6	13	128	92	471	176	126

## Sheet: fig6
treatment	roof	date code	date	arth s	plant H	plant touches
1	ben_gurion	1	feb14	1	1.87686	189
2	ben_gurion	1	feb14	3	1.81349	189
3	ben_gurion	1	feb14	2	1.87494	141
4	ben_gurion	1	feb14	5	1.81022	173
1	ben_gurion	1	feb14	2	1.57818	164
2	ben_gurion	1	feb14	4	1.5441	159
3	ben_gurion	1	feb14	4	1.72861	117
4	ben_gurion	1	feb14	1	1.89543	165
1	ben_gurion	2	march14	10	1.62204	163
2	ben_gurion	2	march14	8	1.71395	196
3	ben_gurion	2	march14	8	2.00168	130
4	ben_gurion	2	march14	10	1.76219	229
1	ben_gurion	2	march14	10	1.78037	150
2	ben_gurion	2	march14	7	1.7963	140
3	ben_gurion	2	march14	14	1.8714	209
4	ben_gurion	2	march14	9	1.95071	165
1	ben_gurion	3	april14	4	1.63879	61
2	ben_gurion	3	april14	6	1.80997	70
3	ben_gurion	3	april14	2	1.65871	74
4	ben_gurion	3	april14	7	1.98839	81
1	ben_gurion	3	april14	4	1.68712	58
2	ben_gurion	3	april14	3	1.82996	65
3	ben_gurion	3	april14	3	1.86482	71
4	ben_gurion	3	april14	3	1.75387	54
1	ben_gurion	4	nov14	9	2.08494	142
2	ben_gurion	4	nov14	3	2.06637	82
3	ben_gurion	4	nov14	7	2.37664	137
4	ben_gurion	4	nov14	7	2.03218	128
1	ben_gurion	4	nov14	6	2.26835	141
2	ben_gurion	4	nov14	7	2.27855	114
3	ben_gurion	4	nov14	8	2.12832	166
4	ben_gurion	4	nov14	9	2.10668	97
1	ben_gurion	5	dec14	14	0.9	207
2	ben_gurion	5	dec14	15	0.65	134
3	ben_gurion	5	dec14	11	0.9	180
4	ben_gurion	5	dec14	13	0.89	218
1	ben_gurion	5	dec14	16	0.91	217
2	ben_gurion	5	dec14	14	0.93	242
3	ben_gurion	5	dec14	9	0.97	313
4	ben_gurion	5	dec14	12	0.78	153
1	ben_gurion	6	jan15	5	2.26654	221
2	ben_gurion	6	jan15	5	1.69657	116
3	ben_gurion	6	jan15	7	2.29219	192
4	ben_gurion	6	jan15	8	2.28002	196
1	ben_gurion	6	jan15	9	2.35982	247
2	ben_gurion	6	jan15	12	2.43171	273
3	ben_gurion	6	jan15	14	2.24	338
4	ben_gurion	6	jan15	16	1.84889	146
1	ben_gurion	7	feb15	13	2.20659	236
2	ben_gurion	7	feb15	17	1.90968	124
3	ben_gurion	7	feb15	12	2.21564	221
4	ben_gurion	7	feb15	18	2.35394	242
1	ben_gurion	7	feb15	12	2.40084	289
2	ben_gurion	7	feb15	15	2.17023	341
3	ben_gurion	7	feb15	15	1.76997	382
4	ben_gurion	7	feb15	14	1.80871	156
1	ben_gurion	8	march15	22	1.81171	474
2	ben_gurion	8	march15	18	1.86541	202
3	ben_gurion	8	march15	20	2.06216	305
4	ben_gurion	8	march15	15	2.16697	323
1	ben_gurion	8	march15	23	1.95555	425
2	ben_gurion	8	march15	19	1.64919	537
3	ben_gurion	8	march15	21	1.32986	586
4	ben_gurion	8	march15	15	1.76784	159
1	ben_gurion	9	april15	6	0.693147	2
2	ben_gurion	9	april15	13	1.74113	122
3	ben_gurion	9	april15	7	0	1
4	ben_gurion	9	april15	19	1.75771	46
1	ben_gurion	9	april15	4	1.64342	10
2	ben_gurion	9	april15	15	0	1
3	ben_gurion	9	april15	14	0	0
4	ben_gurion	9	april15	13	1.67996	108
1	ben_gurion	10	may15	12	1.32966	6
2	ben_gurion	10	may15	6	1.57173	63
3	ben_gurion	10	may15	12	1.71155	17
4	ben_gurion	10	may15	10	2.19096	35
1	ben_gurion	10	may15	16	1.49884	21
2	ben_gurion	10	may15	11	0	0
3	ben_gurion	10	may15	12	1.24245	6
4	ben_gurion	10	may15	5	1.48147	80
1	ben_gurion	11	july15	10	0	2
2	ben_gurion	11	july15	10	0	0
3	ben_gurion	11	july15	4	0	0
4	ben_gurion	11	july15	5	0	0
1	ben_gurion	11	july15	8	0	0
2	ben_gurion	11	july15	13	0	0
3	ben_gurion	11	july15	16	0	0
4	ben_gurion	11	july15	3	0	0
1	ben_gurion	12	nov15	10	0.990659	541
2	ben_gurion	12	nov15	11	0.855577	481
3	ben_gurion	12	nov15	8	0.927275	447
4	ben_gurion	12	nov15	11	0.925457	518
1	ben_gurion	12	nov15	9	1.13994	568
2	ben_gurion	12	nov15	10	1.5277	303
3	ben_gurion	12	nov15	8	1.29764	468
4	ben_gurion	12	nov15	12	0.547729	410
1	ben_gurion	13	dec15	7	0.44353	273
2	ben_gurion	13	dec15	8	0.577941	279
3	ben_gurion	13	dec15	6	0.775157	208
4	ben_gurion	13	dec15	8	0.81383	340
1	ben_gurion	13	dec15	10	1.18636	339
2	ben_gurion	13	dec15	11	1.60686	307
3	ben_gurion	13	dec15	13	1.32999	266
4	ben_gurion	13	dec15	4	0.431014	266
1	ben_gurion	14	jan16	12	0.573362	403
2	ben_gurion	14	jan16	12	0.778226	308
3	ben_gurion	14	jan16	12	0.691231	237
4	ben_gurion	14	jan16	10	0.91665	435
1	ben_gurion	14	jan16	9	1.18714	443
2	ben_gurion	14	jan16	16	1.81529	416
3	ben_gurion	14	jan16	14	1.32555	415
4	ben_gurion	14	jan16	9	0.907067	407
1	ben_gurion	15	feb16	12	0.675229	336
2	ben_gurion	15	feb16	17	0.897906	281
3	ben_gurion	15	feb16	10	0.846003	256
4	ben_gurion	15	feb16	15	1.12487	535
1	ben_gurion	15	feb16	15	1.37538	377
2	ben_gurion	15	feb16	22	1.68967	450
3	ben_gurion	15	feb16	16	1.37913	322
4	ben_gurion	15	feb16	14	1.31329	426
1	ben_gurion	16	march16	21	0.603347	536
2	ben_gurion	16	march16	29	1.08875	434
3	ben_gurion	16	march16	22	0.677776	368
4	ben_gurion	16	march16	22	0.797938	343
1	ben_gurion	16	march16	27	1.06899	346
2	ben_gurion	16	march16	25	1.47926	194
3	ben_gurion	16	march16	27	1.33041	306
4	ben_gurion	16	march16	17	0.680061	520
1	ben_gurion	17	april16	16	0	1
2	ben_gurion	17	april16	10	0	3
3	ben_gurion	17	april16	13	0	1
4	ben_gurion	17	april16	14	0	0
1	ben_gurion	17	april16	14	0	0
2	ben_gurion	17	april16	19	0	1
3	ben_gurion	17	april16	21	0	0
4	ben_gurion	17	april16	13	0	0
1	ben_gurion	18	may16	19	0	0
2	ben_gurion	18	may16	13	0	0
3	ben_gurion	18	may16	9	0	0
4	ben_gurion	18	may16	9	0	0
1	ben_gurion	18	may16	13	0	0
2	ben_gurion	18	may16	16	0	0
3	ben_gurion	18	may16	14	0	0
4	ben_gurion	18	may16	19	0	0
1	dinur	1	feb14	3	1.73379	230
2	dinur	1	feb14	5	1.97055	256
3	dinur	1	feb14	3	1.91181	175
4	dinur	1	feb14	7	1.87927	168
1	dinur	1	feb14	3	1.86885	182
2	dinur	1	feb14	2	1.82357	235
3	dinur	1	feb14	4	2.10639	147
4	dinur	1	feb14	7	1.79601	173
1	dinur	2	march14	12	1.85446	123
2	dinur	2	march14	9	1.81542	94
3	dinur	2	march14	18	2.14008	151
4	dinur	2	march14	13	2.07215	130
1	dinur	2	march14	16	2.04424	132
2	dinur	2	march14	13	2.01019	168
3	dinur	2	march14	9	2.01619	119
4	dinur	2	march14	7	1.99074	155
1	dinur	3	april14	14	1.5782	59
2	dinur	3	april14	9	1.80419	68
3	dinur	3	april14	4	1.30605	62
4	dinur	3	april14	6	1.65625	51
1	dinur	3	april14	7	1.72031	61
2	dinur	3	april14	9	1.62571	55
3	dinur	3	april14	6	1.56581	58
4	dinur	3	april14	7	1.60043	58
1	dinur	4	nov14	9	2.25704	123
2	dinur	4	nov14	12	2.05797	106
3	dinur	4	nov14	14	2.23846	131
4	dinur	4	nov14	11	2.31264	106
1	dinur	4	nov14	7	2.33408	147
2	dinur	4	nov14	8	2.21515	93
3	dinur	4	nov14	9	2.22701	100
4	dinur	4	nov14	7	2.43418	67
1	dinur	5	dec14	25	0.86	211
2	dinur	5	dec14	20	0.94	282
3	dinur	5	dec14	21	0.94	269
4	dinur	5	dec14	19	0.97	261
1	dinur	5	dec14	29	0.93	251
2	dinur	5	dec14	22	0.88	193
3	dinur	5	dec14	23	0.87	198
4	dinur	5	dec14	18	0.88	226
1	dinur	6	jan15	22	2.45852	196
2	dinur	6	jan15	22	2.24603	257
3	dinur	6	jan15	18	2.44018	254
4	dinur	6	jan15	22	2.43472	261
1	dinur	6	jan15	23	2.45612	267
2	dinur	6	jan15	28	2.58713	228
3	dinur	6	jan15	20	2.51047	191
4	dinur	6	jan15	14	2.6419	236
1	dinur	7	feb15	22	2.7126	168
2	dinur	7	feb15	24	2.43169	244
3	dinur	7	feb15	24	2.52771	269
4	dinur	7	feb15	26	2.43057	291
1	dinur	7	feb15	25	2.54898	246
2	dinur	7	feb15	23	2.5611	241
3	dinur	7	feb15	24	2.57972	192
4	dinur	7	feb15	24	2.51696	235
1	dinur	8	march15	20	2.51029	204
2	dinur	8	march15	34	2.18251	332
3	dinur	8	march15	29	2.10063	338
4	dinur	8	march15	21	1.88606	418
1	dinur	8	march15	27	2.26421	223
2	dinur	8	march15	19	2.38456	249
3	dinur	8	march15	21	2.30583	245
4	dinur	8	march15	24	2.15841	346
1	dinur	9	april15	12	2.28748	156
2	dinur	9	april15	12	2.04523	33
3	dinur	9	april15	14	1.92154	36
4	dinur	9	april15	13	1.49437	15
1	dinur	9	april15	12	2.21456	51
2	dinur	9	april15	11	2.29054	112
3	dinur	9	april15	8	1.98133	16
4	dinur	9	april15	11	1.42706	19
1	dinur	10	may15	6	2.24541	38
2	dinur	10	may15	6	1.90028	44
3	dinur	10	may15	6	1.96778	22
4	dinur	10	may15	11	1.54649	25
1	dinur	10	may15	8	1.56666	47
2	dinur	10	may15	14	2.15225	69
3	dinur	10	may15	7	1.68057	30
4	dinur	10	may15	13	1.72746	17
1	dinur	11	july15	3	0	0
2	dinur	11	july15	7	0	1
3	dinur	11	july15	4	0	0
4	dinur	11	july15	9	0	0
1	dinur	11	july15	6	0	0
2	dinur	11	july15	4	0	0
3	dinur	11	july15	3	0	0
4	dinur	11	july15	5	0	0
1	dinur	12	nov15	11	0.876439	292
2	dinur	12	nov15	18	1.10375	317
3	dinur	12	nov15	12	0.952926	427
4	dinur	12	nov15	16	1.61017	360
1	dinur	12	nov15	14	1.57312	299
2	dinur	12	nov15	16	0.951444	440
3	dinur	12	nov15	15	2.20581	232
4	dinur	12	nov15	15	1.49476	298
1	dinur	13	dec15	9	1.0368	275
2	dinur	13	dec15	10	1.88959	166
3	dinur	13	dec15	21	1.00199	358
4	dinur	13	dec15	13	1.69783	352
1	dinur	13	dec15	21	1.84993	277
2	dinur	13	dec15	17	1.31421	432
3	dinur	13	dec15	16	2.22194	223
4	dinur	13	dec15	20	1.93947	432
1	dinur	14	jan16	12	0.972594	236
2	dinur	14	jan16	14	1.82212	191
3	dinur	14	jan16	16	1.05399	321
4	dinur	14	jan16	19	1.68585	423
1	dinur	14	jan16	16	1.76638	220
2	dinur	14	jan16	15	1.12868	425
3	dinur	14	jan16	12	2.06767	234
4	dinur	14	jan16	13	2.17869	347
1	dinur	15	feb16	16	1.23781	255
2	dinur	15	feb16	21	1.8111	239
3	dinur	15	feb16	16	1.12496	318
4	dinur	15	feb16	21	1.26509	662
1	dinur	15	feb16	14	1.78562	243
2	dinur	15	feb16	9	1.18932	433
3	dinur	15	feb16	14	2.23657	253
4	dinur	15	feb16	14	1.95907	471
1	dinur	16	march16	17	1.14084	387
2	dinur	16	march16	26	1.70773	232
3	dinur	16	march16	24	1.16581	463
4	dinur	16	march16	32	1.14047	384
1	dinur	16	march16	23	1.53145	263
2	dinur	16	march16	27	1.21469	386
3	dinur	16	march16	19	2.09556	157
4	dinur	16	march16	27	1.64294	177
1	dinur	17	april16	12	0	1
2	dinur	17	april16	12	0.693147	2
3	dinur	17	april16	20	0	0
4	dinur	17	april16	15	0	1
1	dinur	17	april16	22	0	0
2	dinur	17	april16	14	0	0
3	dinur	17	april16	15	1.03972	4
4	dinur	17	april16	17	0	0
1	dinur	18	may16	10	0	0
2	dinur	18	may16	10	0	0
3	dinur	18	may16	10	0	0
4	dinur	18	may16	16	0	0
1	dinur	18	may16	5	0	0
2	dinur	18	may16	11	0	0
3	dinur	18	may16	8	0	0
4	dinur	18	may16	10	0	0
1	reali	1	feb14	3	2.18259	166
2	reali	1	feb14	3	1.69551	270
3	reali	1	feb14	3	1.92087	153
4	reali	1	feb14	2	1.97352	233
1	reali	1	feb14	3	1.94449	198
2	reali	1	feb14	4	1.52118	223
3	reali	1	feb14	2	1.92236	168
4	reali	1	feb14	5	1.81109	235
1	reali	2	march14	15	2.34078	136
2	reali	2	march14	15	1.98411	190
3	reali	2	march14	15	1.99382	178
4	reali	2	march14	8	2.05831	129
1	reali	2	march14	10	2.11759	147
2	reali	2	march14	13	1.79115	150
3	reali	2	march14	10	2.13961	172
4	reali	2	march14	20	2.06401	168
1	reali	3	april14	15	1.59768	70
2	reali	3	april14	13	1.67967	56
3	reali	3	april14	7	1.33643	73
4	reali	3	april14	9	1.61667	56
1	reali	3	april14	11	1.6079	62
2	reali	3	april14	8	1.15908	74
3	reali	3	april14	12	1.64982	57
4	reali	3	april14	13	1.91329	73
1	reali	4	nov14	12	2.35716	115
2	reali	4	nov14	8	1.44312	108
3	reali	4	nov14	9	2.13828	157
4	reali	4	nov14	7	2.05325	80
1	reali	4	nov14	6	2.12311	126
2	reali	4	nov14	6	1.8727	85
3	reali	4	nov14	8	1.81058	117
4	reali	4	nov14	8	1.9735	121
1	reali	5	dec14	10	0.9	173
2	reali	5	dec14	15	0.98	199
3	reali	5	dec14	15	0.98	291
4	reali	5	dec14	10	0.93	277
1	reali	5	dec14	14	0.95	272
2	reali	5	dec14	12	0.87	189
3	reali	5	dec14	16	0.91	215
4	reali	5	dec14	11	0.99	285
1	reali	6	jan15	17	2.22016	164
2	reali	6	jan15	13	2.04579	221
3	reali	6	jan15	9	2.11178	343
4	reali	6	jan15	11	2.14732	355
1	reali	6	jan15	15	2.3998	223
2	reali	6	jan15	12	1.64298	118
3	reali	6	jan15	13	1.71695	160
4	reali	6	jan15	12	2.195	343
1	reali	7	feb15	16	2.20561	145
2	reali	7	feb15	16	2.11738	203
3	reali	7	feb15	18	1.78585	489
4	reali	7	feb15	18	1.83713	573
1	reali	7	feb15	16	2.27184	231
2	reali	7	feb15	16	2.17866	108
3	reali	7	feb15	17	1.933	122
4	reali	7	feb15	15	1.67768	418
1	reali	8	march15	12	2.02102	135
2	reali	8	march15	20	1.57711	359
3	reali	8	march15	11	1.46869	541
4	reali	8	march15	27	1.63755	514
1	reali	8	march15	16	1.77393	363
2	reali	8	march15	22	2.32527	117
3	reali	8	march15	15	2.11701	115
4	reali	8	march15	22	1.42043	614
1	reali	9	april15	16	2.15443	156
2	reali	9	april15	14	1.73209	56
3	reali	9	april15	11	0	0
4	reali	9	april15	10	0	0
1	reali	9	april15	18	2.04709	74
2	reali	9	april15	17	2.41651	155
3	reali	9	april15	20	2.31074	119
4	reali	9	april15	12	0.655482	11
1	reali	10	may15	9	2.08584	50
2	reali	10	may15	14	1.87231	46
3	reali	10	may15	21	0	1
4	reali	10	may15	21	0	1
1	reali	10	may15	18	1.80768	28
2	reali	10	may15	8	1.4345	78
3	reali	10	may15	11	2.19685	53
4	reali	10	may15	19	1.52296	9
1	reali	11	july15	5	0	0
2	reali	11	july15	8	0	14
3	reali	11	july15	11	0	0
4	reali	11	july15	8	0.450561	6
1	reali	11	july15	15	0	0
2	reali	11	july15	8	0	0
3	reali	11	july15	6	0	0
4	reali	11	july15	13	0.286836	12
1	reali	12	nov15	8	1.18462	270
2	reali	12	nov15	13	1.66302	256
3	reali	12	nov15	11	1.97986	171
4	reali	12	nov15	10	1.43768	188
1	reali	12	nov15	13	1.80083	279
2	reali	12	nov15	11	1.85786	162
3	reali	12	nov15	12	1.55506	283
4	reali	12	nov15	8	1.74449	273
1	reali	13	dec15	13	1.28273	145
2	reali	13	dec15	15	1.44346	300
3	reali	13	dec15	17	1.92722	214
4	reali	13	dec15	12	1.9414	101
1	reali	13	dec15	16	1.69324	142
2	reali	13	dec15	10	1.81514	185
3	reali	13	dec15	11	1.57257	228
4	reali	13	dec15	19	1.5332	254
1	reali	14	jan16	9	1.09402	247
2	reali	14	jan16	17	1.25147	474
3	reali	14	jan16	20	1.81548	280
4	reali	14	jan16	6	2.0099	192
1	reali	14	jan16	15	1.66214	162
2	reali	14	jan16	12	1.73485	259
3	reali	14	jan16	11	1.55013	293
4	reali	14	jan16	16	1.60845	458
1	reali	15	feb16	17	1.35818	184
2	reali	15	feb16	18	1.23935	542
3	reali	15	feb16	24	1.39364	468
4	reali	15	feb16	19	1.75594	374
1	reali	15	feb16	23	1.40314	381
2	reali	15	feb16	19	1.31695	427
3	reali	15	feb16	14	1.36544	493
4	reali	15	feb16	23	1.39756	524
1	reali	16	march16	26	1.7504	237
2	reali	16	march16	29	0.9586	323
3	reali	16	march16	30	1.13014	245
4	reali	16	march16	26	1.24801	293
1	reali	16	march16	26	1.13526	338
2	reali	16	march16	24	1.22844	335
3	reali	16	march16	29	1.1572	295
4	reali	16	march16	32	0.916942	276
1	reali	17	april16	15	0	0
2	reali	17	april16	12	0	1
3	reali	17	april16	19	1.03972	4
4	reali	17	april16	18	0.636514	3
1	reali	17	april16	15	0	1
2	reali	17	april16	20	0	1
3	reali	17	april16	12	0	3
4	reali	17	april16	15	0.562335	4
1	reali	18	may16	10	0	1
2	reali	18	may16	13	0	0
3	reali	18	may16	16	0	1
4	reali	18	may16	10	0	2
1	reali	18	may16	13	0	0
2	reali	18	may16	13	0	1
3	reali	18	may16	14	0	0
4	reali	18	may16	11	0	2

## Sheet: table 6
ID	block	treatment	roof	year	predator and parasitoid total	herbivore total	H' plants	abundance plants	predator and parasitoid diversity	herbivore diversity
1A	A	1	dinur	2	6	27	2.7126	168	3	3
2A	A	2	dinur	2	5	26	2.43169	244	3	4
3A	A	3	dinur	2	10	53	2.52771	269	3	4
4A	A	4	dinur	2	22	80	2.43057	291	7	4
1B	B	1	dinur	2	12	46	2.54898	246	5	2
2B	B	2	dinur	2	12	40	2.5611	241	3	3
3B	B	3	dinur	2	12	42	2.57972	192	6	3
4B	B	4	dinur	2	9	42	2.51696	235	3	5
1C	C	1	ben gurion	2	4	15	2.20659	236	3	4
2C	C	2	ben gurion	2	3	32	1.90968	124	2	3
3C	C	3	ben gurion	2	6	14	2.21564	221	2	3
4C	C	4	ben gurion	2	8	22	2.35394	242	6	4
1D	D	1	ben gurion	2	4	26	2.40084	289	3	3
2D	D	2	ben gurion	2	14	21	2.17023	341	2	3
3D	D	3	ben gurion	2	25	29	1.76997	382	6	1
4D	D	4	ben gurion	2	5	29	1.80871	156	2	1
1E	E	1	reali	2	1	24	2.20561	145	1	5
2E	E	2	reali	2	11	92	2.11738	203	5	2
3E	E	3	reali	2	16	16	1.78585	489	3	3
4E	E	4	reali	2	25	39	1.83713	573	4	3
1F	F	1	reali	2	13	74	2.27184	231	2	4
2F	F	2	reali	2	4	128	2.17866	108	2	5
3F	F	3	reali	2	8	112	1.933	122	5	2
4F	F	4	reali	2	13	26	1.67768	418	5	2
1A	A	1	dinur	3	5	13	1.23781	255	4	2
2A	A	2	dinur	3	6	9	1.8111	239	3	3
3A	A	3	dinur	3	12	17	1.12496	318	2	2
4A	A	4	dinur	3	28	19	1.26509	662	4	1
1B	B	1	dinur	3	8	11	1.78562	243	2	5
2B	B	2	dinur	3	7	9	1.18932	433	3	3
3B	B	3	dinur	3	3	12	2.23657	253	1	2
4B	B	4	dinur	3	12	7	1.95907	471	6	3
1C	C	1	ben gurion	3	14	37	0.675229	336	3	3
2C	C	2	ben gurion	3	5	11	0.897906	281	5	3
3C	C	3	ben gurion	3	0	28	0.846003	256	0	4
4C	C	4	ben gurion	3	8	46	1.12487	535	3	3
1D	D	1	ben gurion	3	19	25	1.37538	377	6	3
2D	D	2	ben gurion	3	28	133	1.68967	450	4	3
3D	D	3	ben gurion	3	10	39	1.37913	322	2	4
4D	D	4	ben gurion	3	2	20	1.31329	426	2	5
1E	E	1	reali	3	2	16	1.35818	184	1	4
2E	E	2	reali	3	10	42	1.23935	542	3	5
3E	E	3	reali	3	12	53	1.39364	468	8	7
4E	E	4	reali	3	10	35	1.75594	374	6	4
1F	F	1	reali	3	11	72	1.40314	381	6	6
2F	F	2	reali	3	3	49	1.31695	427	2	6
3F	F	3	reali	3	10	81	1.36544	493	3	5
4F	F	4	reali	3	15	54	1.39756	524	6	5
